# Supplementary material
Source: PubMed Central journal article supplement (PMC4697681)
Supplement: ajcr0005-3339-f6.pdf [file ajcr0005-3339-f6.pdf]

## Phenformin inhibits NSCLC growth and angiogenesis

**Supplementary Table 1.** Primers used for PCR and sequence analysis

---

|                |                                                                               |
|----------------|-------------------------------------------------------------------------------|
| VEGFA          | Forward: 5'-GCTCCTGGAAGCCATTGAGAA-3'<br>Reverse: 5'-GTCGATCATCTCCAAGTCCAC-3'  |
| IL-6           | Forward: 5'-GTGGCCAAGG ACGAGGTG-3'<br>Reverse: 5'-ACAGGTGGAAGAACAGCTCGC-3'    |
| PDGFA          | Forward: 5'-GGCTCATGCCTTCGCCCCAG-3'<br>Reverse: 5'-ACTCCCATCGGCGTTCCCA-3'     |
| FGF1           | Forward: 5'-TGACAGCGACAAGAAGTG-3'<br>Reverse: 5'-CAGTGAAGCGGTACATAGG-3'       |
| CCL2           | Forward: 5'-TCAACTCAAGCTCCTAA-3'<br>Reverse: 5'-CCTACTCAGACTTTATTCAA-3'       |
| VEGFC          | Forward: 5'-TCACAGGCTTCCATTGACCAG-3'<br>Reverse: 5'-CCGAGGCTTTTCTACCAGA-3'    |
| IL-8           | Forward: 5'-TGCTGGAGAACATTCTAGAGAAC-3'<br>Reverse: 5'-CACAGTCTCTGAAGGTGTTT-3' |
| CXCL2          | Forward: 5'-ACCATGCCGCCCTCCGGG-3'<br>Reverse: 5'-TCAGCTGCACTTGCAGGAGC-3'      |
| $\beta$ -actin | Forward: 5'-GCTGCGTGTGGCCCTGAG-3'<br>Reverse: 5'-ACGCAGGATGGCATGAGGGA-3'      |

---

Phenformin inhibits NSCLC growth and angiogenesis

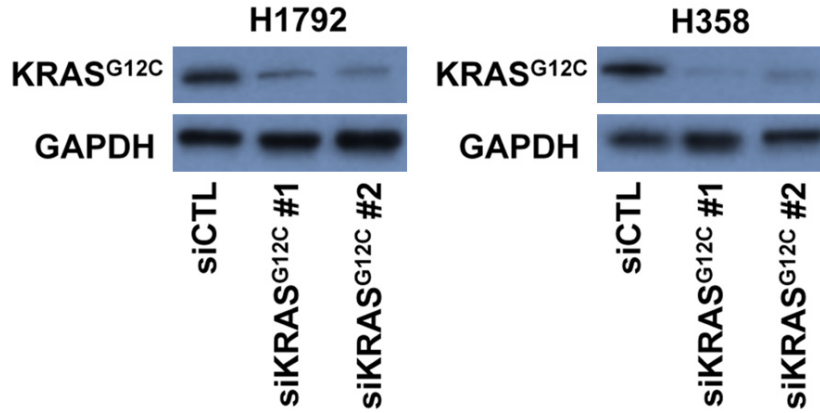

**Figure S1.** Tumor cells were transfected with KRAS<sup>G12C</sup> siRNA (2 µg/well for 6 well culture plates). Western blot analysis to assay the KRAS<sup>G12C</sup> in control cells, siCTL and siKRAS<sup>G12C</sup> transfected cells. GAPDH was used as a loading control.

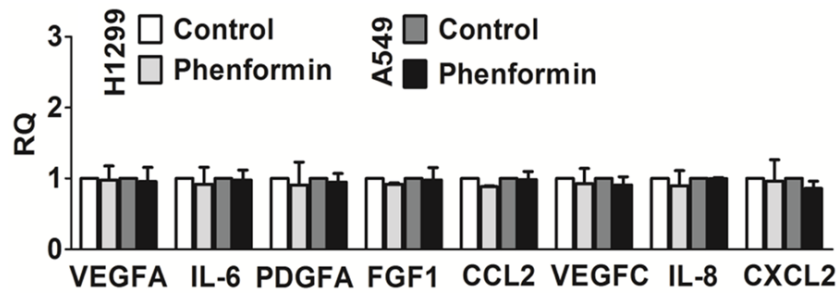

**Figure S2.** Phenformin treatment regulates the expression of pro-angiogenic factors in H1299 and A549 cells. Expression of proangiogenic factors was evaluated by real-time PCR. Cells carrying wild type KRAS was treated for 24 h with trametinib. Data are expressed as relative quantity (RQ) of trametinib compared with vehicle-treated samples. Bars show mean ± SD of triplicate measurements.
